# Supplementary material
Source: PubMed Central journal article supplement (PMC4845098)

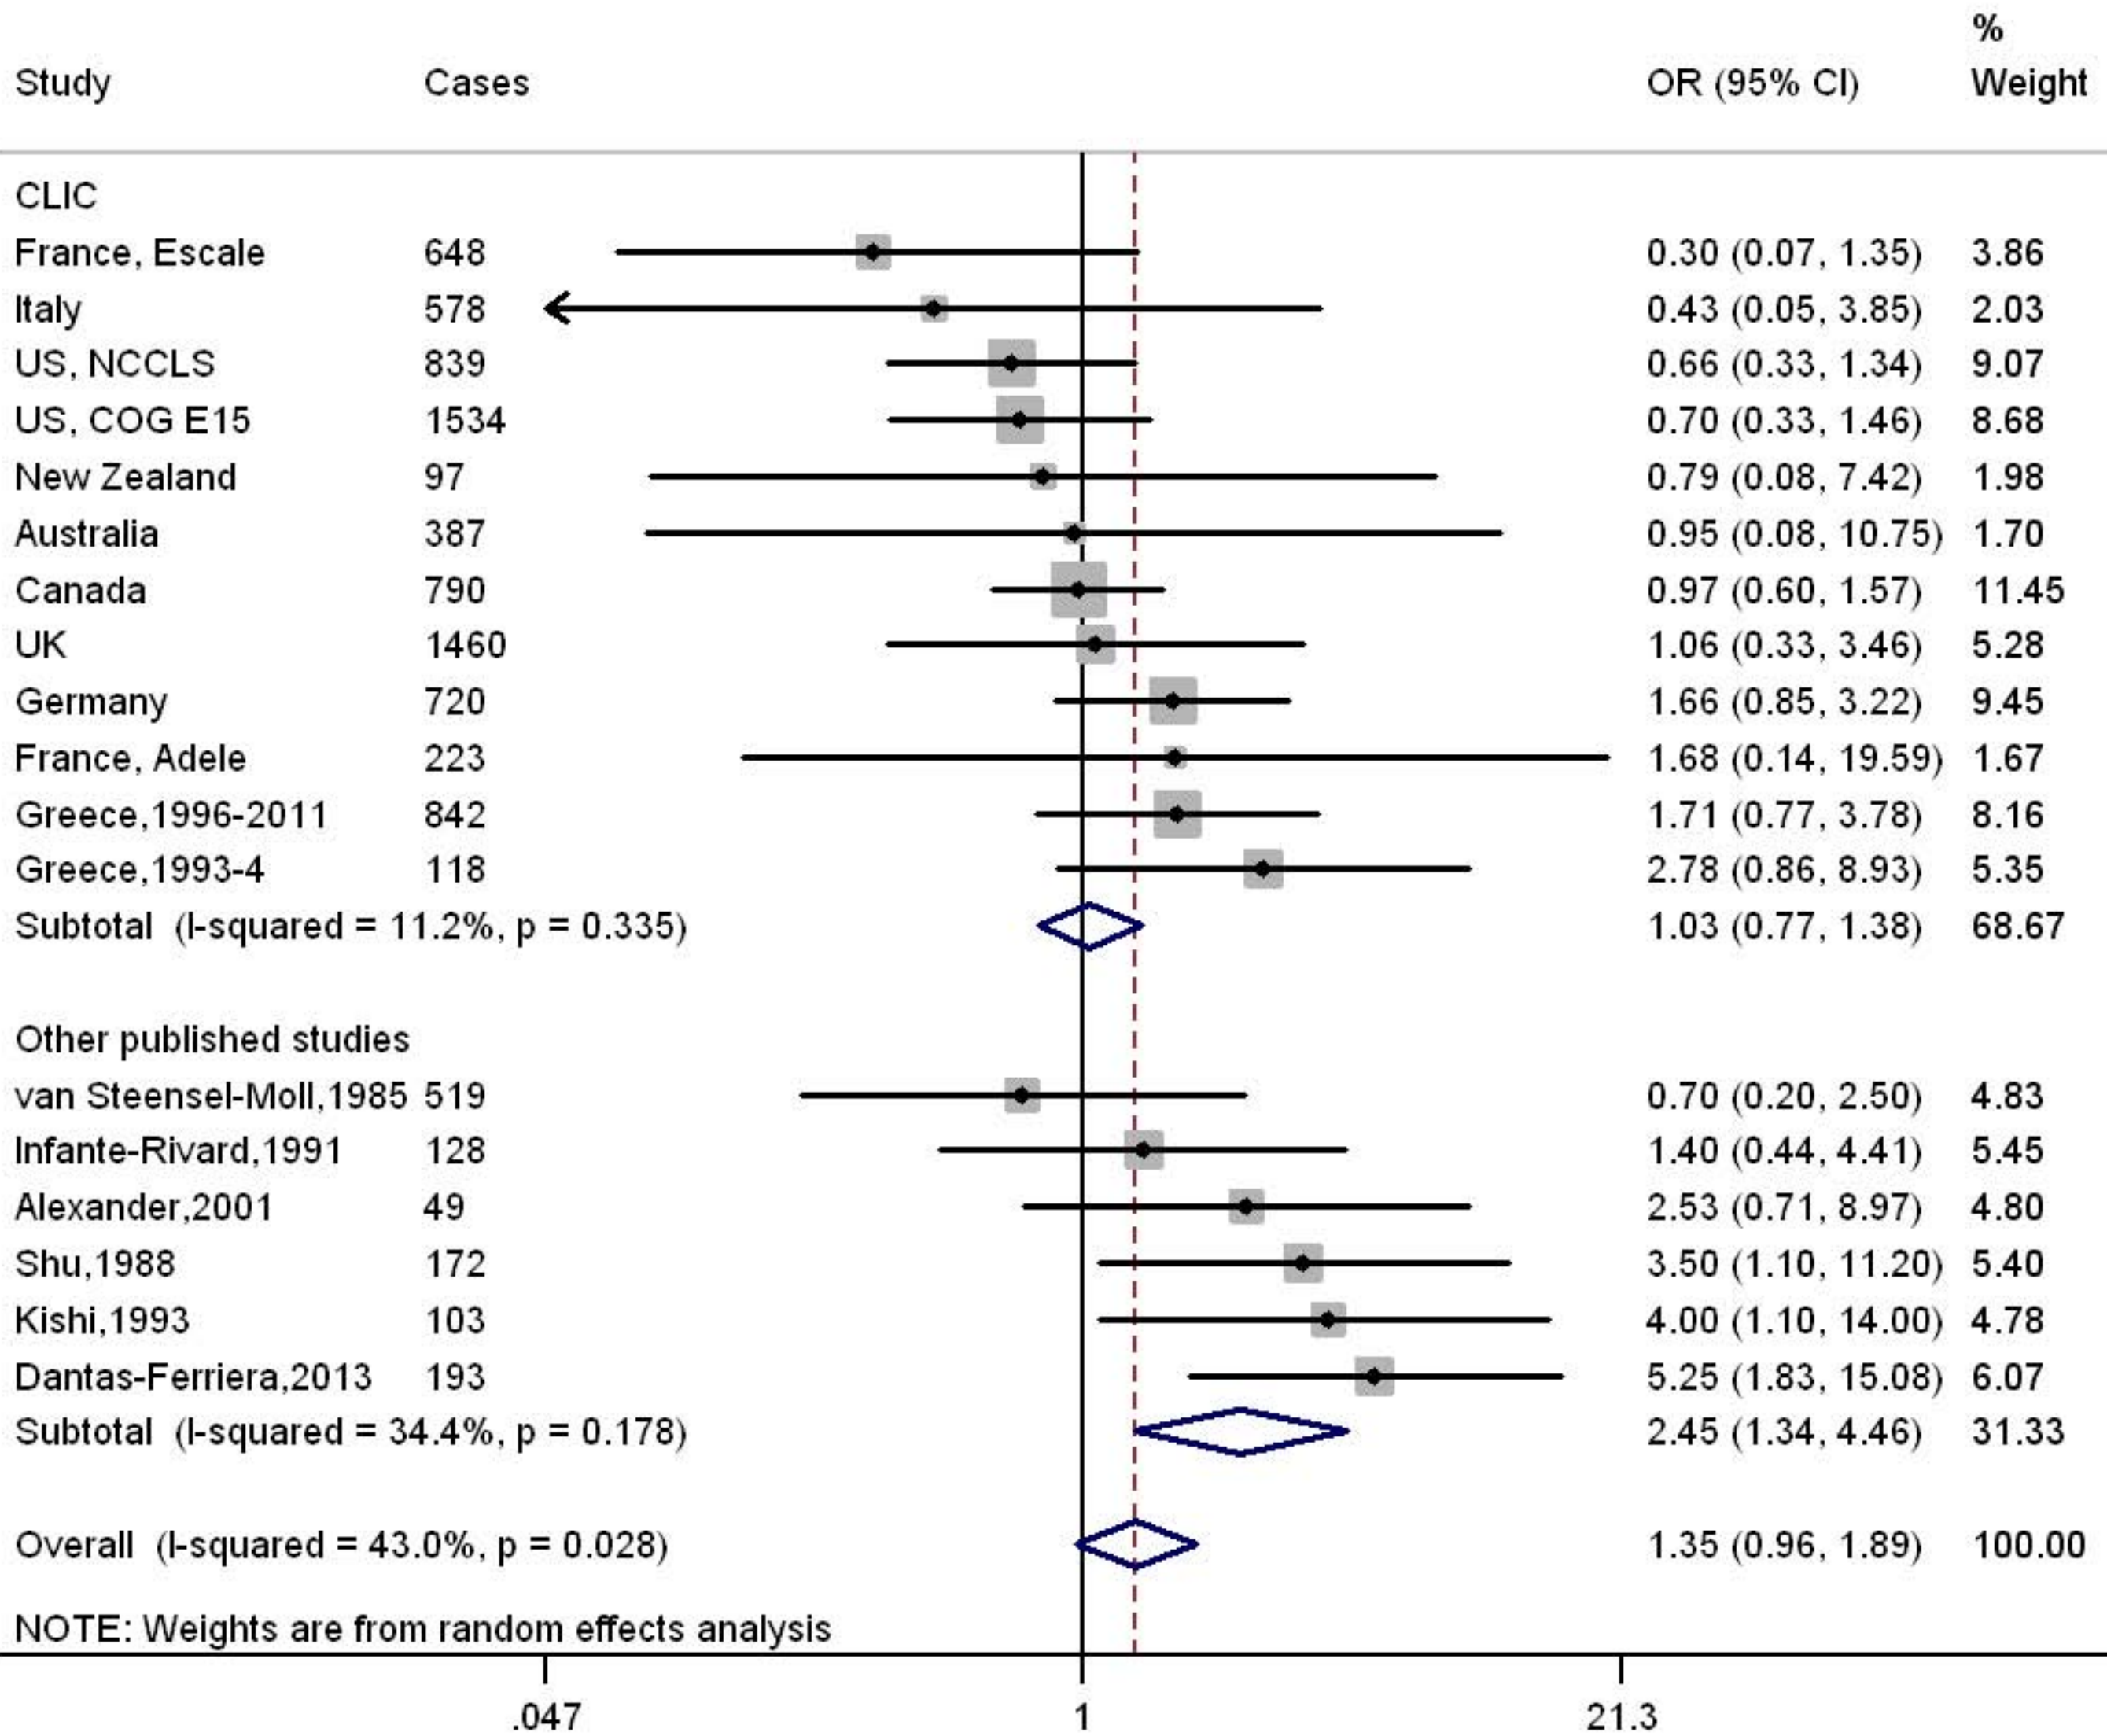

NOTE: Weights are from random effects analysis

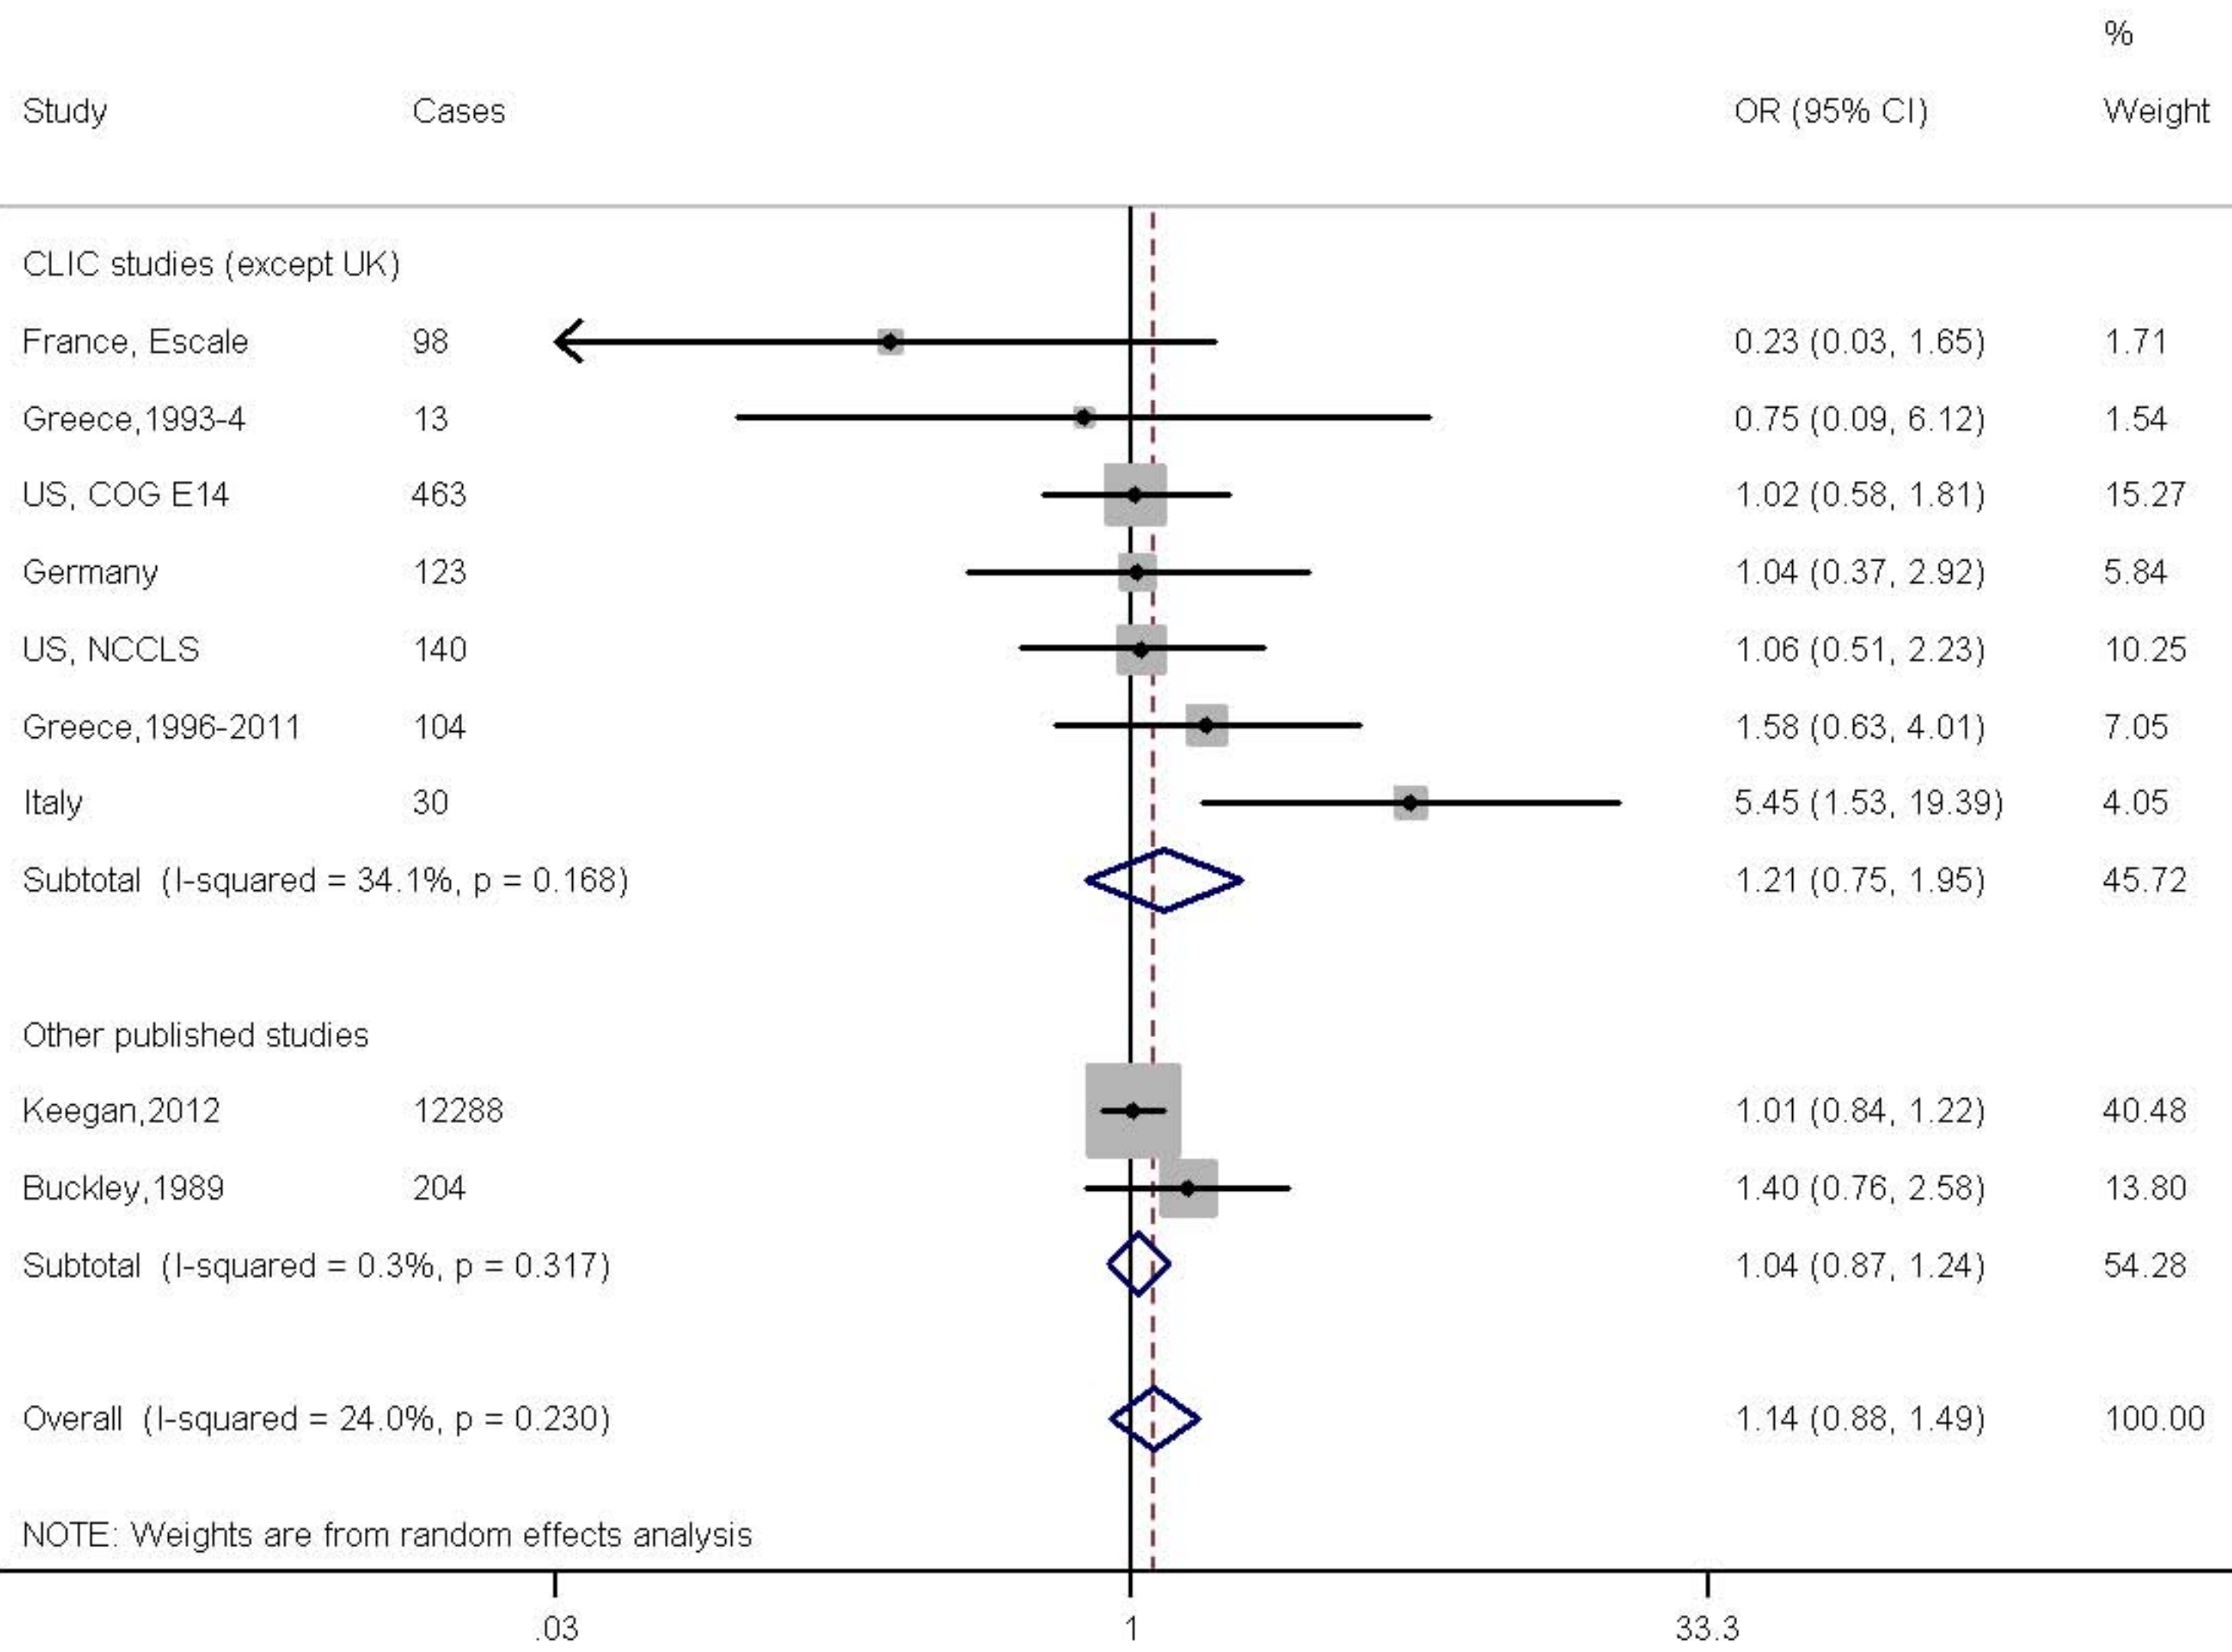

NOTE: Weights are from random effects analysis

Supplement: NIHMS577237-supplement-Supp_FigureS1-S2.pdf [file NIHMS577237-supplement-Supp_FigureS1-S2.pdf]
